# Supplementary material for: Genome-Wide Analysis of the NAC Transcription Factor Gene Family Reveals Differential Expression Patterns and Cold-Stress Responses in the Woody Plant Prunus mume
Source: Genes (Basel). 2018 Oct 12;9(10):494. doi: 10.3390/genes9100494 (PMC6209978; doi:10.3390/genes9100494)
Supplement: Supplementary file 1 [file genes-09-00494-s001.zip]

Archive with 5 entries (4 files):
- Supplementary materials/
- Supplementary materials/Supplemantary Table S1-9.xlsx
- Supplementary materials/Supplementary Figure.pdf
- Supplementary materials/Supplementary File S1 .pdf
- Supplementary materials/Supplementary File S2.docx
