# Supplementary material for: Genome-Wide Analysis of the NAC Transcription Factor Gene Family Reveals Differential Expression Patterns and Cold-Stress Responses in the Woody Plant Prunus mume
Source: Genes (Basel). 2018 Oct 12;9(10):494. doi: 10.3390/genes9100494 (PMC6209978; doi:10.3390/genes9100494)
Supplement: Supplementary file 1 [file genes-09-00494-s001.zip › Supplementary materials/Supplemantary Table S1-9.xlsx]

## Sheet: Table S1
Supplementary Table S1 Primer sequences used for qRT-PCR.
Gene name	Primer name	Sequence	Amplicon Length	TM
PmNAC011	Pnac11-F	GATAACCCAACTACCACTACCAC	97	62
PmNAC011	Pnac11-R	GACAACTCCCAGATACCACG		62
PmNAC020	Pnac20-F	GCACCTCCAAGATCAGATGAG	123	62
PmNAC020	Pnac20-R	CTTGCCACAAACAGCTGAAC		62
PmNAC023	Pnac23-F	GGACAGGAAGTACCCAAATGG	88	62
PmNAC023	Pnac23-R	GTAAATTGCCTTGTCTGTGCC		62
PmNAC040	Pnac40-F	ACCCTTATGATTGAAGTTGACCTC	104	62
PmNAC040	Pnac40-R	CGATCACGCTGACTGTAGAAG		62
PmNAC042	Pnac42-F	CGCATAAACTCGCTCAAAACG	133	62
PmNAC042	Pnac42-R	GGTTATTGGGACACAGTTCAGG		62
PmNAC048	Pnac48-F	TTGGATCATGCACGAGTACC	100	62
PmNAC048	Pnac48-R	GTATATTCGGCATAGCACCCA		62
PmNAC057	Pnac57-F	AGGAGTGAAGATGCCAGTTG	141	62
PmNAC057	Pnac57-R	CAGGGATGAGTGTGGAAGAC		62
PmNAC059	Pnac59-F	CGATATCTACAAGACAGAGCCC	76	62
PmNAC059	Pnac59-R	GAAGTACCACTCCAAATCCCC		62
PmNAC060	Pnac60-F	TGAGCACAAGATTCAACCTCC	79	62
PmNAC060	Pnac60-R	AGCTTCAAGAACCTCTCATGG		62
PmNAC061	Pnac61-F	TGAAGGTCGTGTGACTCAATG	120	62
PmNAC061	Pnac61-R	CGACACAGAACAAAATCCCTC		62
PmNAC066	Pnac66-F	AAGACCAAACTTCACCCCAG	112	62
PmNAC066	Pnac66-R	AAACAGAAAGGCAAATGACCAC		62
PmNAC082	Pnac82-F	GAGCTGGTCTTTCAGTACCTAAG	96	62
PmNAC082	Pnac82-R	CCAAGGATCATACATGCAAACG		62
PmNAC085	Pnac85-F	CTTTGTATCAGGGTGGAGGTATG	120	62
PmNAC085	Pnac85-R	GTCCTGAACTTGAACTCTCCG		62
PmNAC086	Pnac86-F	GTTTTCGGTTTCATCCCACG	112	62
PmNAC086	Pnac86-R	CACTTGTTCAAATCAGCTTCCC		62
PmNAC107	Pnac107-F	AAGAAAATAGCGGGCGAGG	149	62
PmNAC107	Pnac107-R	GTGGTCCTGTAGCAACTATCG		62
PmPP2A	PP2A-F	ATATAGCTGCTCAGTTCAACC	113	62
PmPP2A	PP2A-R	AAAAACAGTCACCACATTCTT		62

## Sheet: Table S2
Supplementary Table S2 Characteristics and classification of the 113 PmNAC proteins.
Locus name	Nomenclature	At orthologue	Alias	Chr	Start(bp)	End(bp)	Length	Subfamily	MW(kDa)	pI	Intron
PmNAC001	Pm000566	ANAC083	VNI2	Chr01	3496872	3498190	338	XIII	38.22	5.2	1
PmNAC002	Pm000962	ANAC009	FEZ	Chr01	5906240	5907097	285	XIV	33.24	5.78	0
PmNAC003	Pm000998	ANAC087		Chr01	6240155	6240820	221	XIV	25.97	7.22	0
PmNAC004	Pm000999			Chr01	6246672	6247388	238	XIV	27.75	9.45	0
PmNAC005	Pm001001	ANAC056	ATNAC2	Chr01	6255754	6257438	306	IV	35.9	6.4	2
PmNAC006	Pm001039	ANAC005		Chr01	6543221	6544594	457	XIII	52.05	4.41	0
PmNAC007	Pm001136	ANAC083	VNI2	Chr01	7376591	7377487	298	XIII	34.49	5.1	0
PmNAC008	Pm001146			Chr01	7430950	7432047	365	XIV	42.26	4.71	0
PmNAC009	Pm001156	ANAC083	VNI2	Chr01	7512525	7513421	298	XIII	34.37	5.25	0
PmNAC010	Pm001157			Chr01	7515195	7516292	365	XIV	42.13	4.73	0
PmNAC011	Pm001403	ANAC090		Chr01	9842010	9843159	255	II	29.17	5.67	2
PmNAC012	Pm001404	ANAC090		Chr01	9852796	9854404	86	II	10.13	4.58	1
PmNAC013	Pm001409	ANAC043	NST1	Chr01	9901508	9902387	187	XII	22.02	7.76	1
PmNAC014	Pm003809	ANAC034		Chr02	398222	400225	424	II	48.32	8.37	2
PmNAC015	Pm003866	ANAC086		Chr02	817228	818505	425	XII	47.25	4.63	0
PmNAC016	Pm004078	ANAC104	XND1	Chr02	2254621	2255955	204	IV	23.36	5.05	4
PmNAC017	Pm004758	ANAC002	ATAF1	Chr02	6999344	7000733	295	III	34.3	8.09	2
PmNAC018	Pm005091	ANAC039		Chr02	9130649	9132950	343	VI	38.39	8.95	2
PmNAC019	Pm005306	ANAC104	XND1	Chr02	10324440	10326461	281	II	31.88	7.12	2
PmNAC020	Pm005783	ANAC028		Chr02	12988408	12990175	382	X	42.4	7.51	4
PmNAC021	Pm006394	ANAC029	NAP	Chr02	16637457	16638391	229	II	26.38	5.21	2
PmNAC022	Pm006396	ANAC029	NAP	Chr02	16646623	16647528	225	II	25.71	4.68	2
PmNAC023	Pm006470	ANAC029	NAP	Chr02	17015491	17016603	288	IV	33.14	7.05	2
PmNAC024	Pm006506	ANAC009	FEZ	Chr02	17199524	17201431	483	II	92.69	8.45	2
PmNAC025	Pm007070	ANAC083	VNI2	Chr02	21205084	21206280	258	V	29.52	9.16	2
PmNAC026	Pm008481	ANAC064		Chr02	33497089	33498147	352	XIV	39.9	4.54	0
PmNAC027	Pm008657	ANAC029	NAP	Chr02	34902941	34904220	321	IV	36.51	5.89	2
PmNAC028	Pm008951			Chr02	37468442	37469536	364	XIV	42.26	4.81	0
PmNAC029	Pm009955	ANAC025		Chr03	1816727	1817576	211	IV	23.96	9.69	2
PmNAC030	Pm010104	ANAC073	SND2	Chr03	2559728	2561611	317	III	35.83	8.47	2
PmNAC031	Pm010673	ANAC042		Chr03	5938771	5940042	315	II	36.31	8.87	3
PmNAC032	Pm010750	ANAC029	NAP	Chr03	6461638	6463765	578	IV	67.49	8.35	3
PmNAC033	Pm010886	ANAC033	SMB	Chr03	7440855	7441447	159	VII	18.48	9.23	2
PmNAC034	Pm010926	ANAC020		Chr03	7693022	7696165	354	VI	40.37	4.69	2
PmNAC035	Pm011037	ANAC036		Chr03	8548383	8550243	320	II	37	6.87	2
PmNAC036	Pm011128	ANAC066	NST2	Chr03	9167160	9168170	336	XI	38.51	4.52	0
PmNAC037	Pm011130	ANAC043	NST1	Chr03	9172204	9172962	252	XI	29.14	5.51	0
PmNAC038	Pm011146	ANAC066	NST2	Chr03	9283280	9284047	255	XI	29.7	5.23	0
PmNAC039	Pm011148	ANAC066	NST2	Chr03	9288056	9288943	295	XI	33.97	4.78	0
PmNAC040	Pm011234	ANAC022	NAC1	Chr03	9772233	9777498	347	VI	38.96	9.04	4
PmNAC041	Pm011397	ANAC098	CUC2	Chr03	10802387	10804067	355	VI	39.49	7.16	2
PmNAC042	Pm011603	ANAC055	ATNAC3	Chr03	12222452	12223710	350	IV	39.31	8.05	2
PmNAC043	Pm011604	ANAC056	ATNAC2	Chr03	12246125	12247508	371	IV	41.25	7.78	3
PmNAC044	Pm011991	ANAC101	VND6	Chr03	15212874	15213965	363	XII	41.32	4.87	0
PmNAC045	Pm011994	ANAC086		Chr03	15227830	15228960	376	XII	42.02	4.82	0
PmNAC046	Pm012091	ANAC101	VND6	Chr03	16047549	16048694	381	XII	42.55	4.7	0
PmNAC047	Pm012336	ANAC032		Chr03	18840393	18842038	383	IV	44.23	6.51	2
PmNAC048	Pm012630	ANAC002	ATAF1	Chr03	21656184	21657564	291	III	33.61	6.19	2
PmNAC049	Pm012993	ANAC028		Chr04	981456	985493	681	VI	77.47	5.47	3
PmNAC050	Pm013492			Chr04	4469955	4471148	397	XII	44.48	4.58	0
PmNAC051	Pm013577			Chr04	5047011	5047469	152	XIV	17.9	10.15	0
PmNAC052	Pm014102			Chr04	9395668	9396331	155	XI	17.73	7.59	1
PmNAC053	Pm014764	ANAC042		Chr04	15305609	15307936	305	II	35.32	8.07	2
PmNAC054	Pm015625	ANAC073	SND2	Chr04	20591961	20603454	1429	III	161.5	6.4	14
PmNAC055	Pm015876	ANAC009	FEZ	Chr04	21862729	21864240	396	II	44.2	6.54	2
PmNAC056	Pm015914	ANAC100	ATNAC5	Chr04	22073430	22074691	351	VI	40.21	6.6	2
PmNAC057	Pm016114	ANAC084		Chr04	23201638	23202571	237	III	27.25	9.55	8
PmNAC058	Pm017547	ANAC051		Chr05	12183841	12189381	640	X	70.06	5.84	3
PmNAC059	Pm017550	ANAC078	NAC2	Chr05	12198270	12201567	590	X	66.44	4.51	2
PmNAC060	Pm018292	ANAC043	NST1	Chr05	17398872	17400381	400	VII	45.21	5.82	2
PmNAC061	Pm018442			Chr05	18366264	18367351	214	VIII	25.4	5.79	3
PmNAC062	Pm018443			Chr05	18369645	18370704	182	VIII	21.52	5.35	3
PmNAC063	Pm018445			Chr05	18373214	18374145	173	VIII	20.57	8.38	2
PmNAC064	Pm019488	ANAC007	VND4	Chr05	24133272	24134516	320	VII	37.06	6.09	2
PmNAC065	Pm019490	ANAC007	VND4	Chr05	24142985	24144291	352	VII	40.62	6.01	2
PmNAC066	Pm019659	ANAC091	TIP	Chr05	25049477	25052389	548	VIII	61.73	5.23	8
PmNAC067	Pm020580	ANAC074		Chr06	3781784	3785100	284	VI	32.78	5.72	2
PmNAC068	Pm020961	ANAC036		Chr06	5942238	5943930	291	II	33.87	7.02	3
PmNAC069	Pm021749	ANAC002	ATAF1	Chr06	11040639	11041499	286	XIV	33.06	5.59	0
PmNAC070	Pm021768	ANAC002	ATAF1	Chr06	11162951	11163811	286	XIV	33.05	5.59	0
PmNAC071	Pm021945	ANAC043	NST1	Chr06	12542395	12543898	272	VII	30.97	8.46	2
PmNAC072	Pm022184	ANAC030	VND7	Chr06	14871252	14873019	303	VII	35.09	6.59	2
PmNAC073	Pm022358	ANAC017		Chr06	16761896	16765351	577	V	65.58	5	2
PmNAC074	Pm022530	ANAC103		Chr06	18525392	18527749	432	I	48.24	4.55	5
PmNAC075	Pm022531	ANAC103		Chr06	18531172	18533227	351	I	39.7	5.3	3
PmNAC076	Pm022533	ANAC103		Chr06	18561145	18563290	351	I	39.32	5.32	3
PmNAC077	Pm022820	ANAC070	BRN2	Chr06	20861780	20863716	378	VII	42.94	7.29	2
PmNAC078	Pm022916	ANAC031	CUC3	Chr07	391531	393970	441	VI	49.96	6.32	2
PmNAC079	Pm023277	ANAC071		Chr07	3770026	3771662	344	I	39.17	5.21	5
PmNAC080	Pm023559	ANAC007	VND4	Chr07	6211300	6212673	377	VII	43.79	6.92	2
PmNAC081	Pm024260	ANAC043	NST1	Chr07	11431775	11433150	394	VII	45.47	5.94	2
PmNAC082	Pm024558	ANAC083	VNI2	Chr07	13031704	13032609	233	V	26.35	8.68	2
PmNAC083	Pm024887	ANAC100	ATNAC5	Chr07	14882651	14883928	360	VI	40.29	7.02	2
PmNAC084	Pm024976	ANAC032		Chr07	15360339	15361580	186	III	21.38	6.3	2
PmNAC085	Pm025184	ANAC058		Chr07	16410976	16416570	591	VI	65.29	9.15	2
PmNAC086	Pm025307	ANAC087		Chr08	72334	73997	455	VI	50.56	6.02	2
PmNAC087	Pm025312	ANAC047		Chr08	111124	112652	384	IV	43.09	8.24	1
PmNAC088	Pm025886			Chr08	6122885	6124311	401	III	46.22	5.95	2
PmNAC089	Pm025887	ANAC081	ATAF2	Chr08	6126772	6129902	333	III	38.32	5.37	3
PmNAC090	Pm026045	ANAC103		Chr08	7357890	7360350	351	I	39.24	4.96	3
PmNAC091	Pm026735	ANAC037	VND1	Chr08	11464246	11466413	335	VII	38.59	5.15	2
PmNAC092	Pm027280	ANAC075		Chr08	14439614	14443374	488	III	55.11	6.63	5
PmNAC093	Pm028056	ANAC090		scaffold103	374715	376468	256	II	28.54	7.12	2
PmNAC094	Pm028250			scaffold1045	17016	18071	351	XII	39.42	4.91	0
PmNAC095	Pm028380	ANAC029	NAP	scaffold1193	30580	32044	383	IV	43.07	4.96	2
PmNAC096	Pm028386	ANAC066	NST2	scaffold1210	2387	3391	222	XI	25.51	5.72	0
PmNAC097	Pm028678			scaffold162	494794	498676	530	IX	59.36	5.04	6
PmNAC098	Pm028710			scaffold162	763462	773286	1036	VIII	118.99	6.25	17
PmNAC099	Pm028711	ANAC014		scaffold162	774604	777054	458	VIII	52.9	6.27	6
PmNAC100	Pm028712	ANAC062	NTL6	scaffold162	778084	780806	489	VIII	56.97	6.08	5
PmNAC101	Pm028713			scaffold162	783390	790559	791	VIII	91.45	4.65	13
PmNAC102	Pm028714			scaffold162	791593	793253	378	IX	42.77	4.97	3
PmNAC103	Pm028717	ANAC028		scaffold162	806291	808155	467	IX	52.93	4.79	4
PmNAC104	Pm028718			scaffold162	811551	815078	453	IX	50.99	4.55	4
PmNAC105	Pm028719	ANAC096		scaffold162	821598	823652	441	IX	49.16	4.86	4
PmNAC106	Pm028720			scaffold162	826364	828462	448	IX	50.67	4.63	4
PmNAC107	Pm028721	ANAC057		scaffold162	832642	834190	324	IX	35.73	5.59	2
PmNAC108	Pm028722	ANAC057		scaffold162	837070	839819	348	IX	38.42	5.64	4
PmNAC109	Pm028723			scaffold162	845518	852721	747	IX	80.99	4.78	12
PmNAC110	Pm029010	ANAC008	SOG1	scaffold205	830923	833842	427	III	48.6	4.91	4
PmNAC111	Pm029581	ANAC014		scaffold2681	1828	6883	851	VIII	95.06	4.97	5
PmNAC112	Pm030099	ANAC025		scaffold475	60079	61400	356	IV	40.65	8.25	2
PmNAC113	Pm031134	ANAC101	VND6	scaffold81	4312	5061	249	XII	28.28	6.6	0
At, Arabidopsis thaliana; Chr., chromosome; pI, isoelectric point; MW, molecular weight.

## Sheet: Table S3
Supplementary Table S3 Duplication events and Ka/Ks values of NAC genes in Prunus mume vs. Prunus prersica.
Gene Name	Duplicated Genes Pairs			E-value	Ka	Ks	Ka/Ks	Estimate time (Mya)
PmNAC001	Pm000566	vs.	ppa022350m	1e-143	0.0977	0.1281	0.762685	4.27
PmNAC003	Pm000998	vs.	ppa017531m	5e-121	0.2072	0.3942	0.525622	13.14
PmNAC005	Pm001001	vs.	ppa015363m	8e-64	0.4974	1.5726	0.316291	52.42
PmNAC006	Pm001039	vs.	ppa018878m	6e-122	0.0152	0.0893	0.170213	2.97667
PmNAC008	Pm001146	vs.	ppa019837m	0	0.0797	0.0811	0.982737	2.70333
PmNAC011	Pm001403	vs.	ppa010337m	1e-179	0.0174	0.0406	0.428571	1.35333
PmNAC013	Pm001409	vs.	ppa019846m	9e-99	0.0208	0.0862	0.241299	2.87333
PmNAC014	Pm003809	vs.	ppa021989m	1e-124	0.0054	0.0313	0.172524	1.04333
PmNAC016	Pm004078	vs.	ppa019508m	2e-125	0.0172	0.0897	0.19175	2.99
PmNAC017	Pm004758	vs.	ppa009380m	0	0.0117	0.1109	0.1055	3.69667
PmNAC018	Pm005091	vs.	ppa025916m	0	0.0063	0.0491	0.12831	1.63667
PmNAC019	Pm005306	vs.	ppa023250m	0	0.0125	0.0367	0.340599	1.22333
PmNAC020	Pm005783	vs.	ppa007090m	0	0.0217	0.0484	0.448347	1.61333
PmNAC021	Pm006394	vs.	ppa026961m	2e-120	0.1202	0.2489	0.482925	8.29667
PmNAC023	Pm006470	vs.	ppa009530m	0	0.0059	0.0816	0.0723039	2.72
PmNAC024	Pm006506	vs.	ppa016710m	4e-112	0.3386	1.4046	0.241065	46.82
PmNAC025	Pm007070	vs.	ppa027024m	6e-88	0.279	1.3199	0.21138	43.9967
PmNAC027	Pm008657	vs.	ppa017089m	4e-128	0.1209	0.1789	0.675797	5.96333
PmNAC028	Pm008951	vs.	ppa023103m	2e-116	0.1325	0.1254	1.05662	4.18
PmNAC030	Pm010104	vs.	ppa008828m	0	0.0027	0.0283	0.0954064	0.943333
PmNAC031	Pm010673	vs.	ppa025263m	0	0.0042	0.0315	0.133333	1.05
PmNAC032	Pm010750	vs.	ppa021190m	1e-133	0.0868	0.1217	0.713229	4.05667
PmNAC033	Pm010886	vs.	ppa025341m	5e-101	0.0219	0.0903	0.242525	3.01
PmNAC034	Pm010926	vs.	ppa017765m	0	0.0122	0.0354	0.344633	1.18
PmNAC035	Pm011037	vs.	ppa026843m	0	0.0119	0.0413	0.288136	1.37667
PmNAC036	Pm011128	vs.	ppa019456m	4e-113	0.07	0.1645	0.425532	5.48333
PmNAC038	Pm011146	vs.	ppa024063m	3e-146	0.024	0.0792	0.30303	2.64
PmNAC040	Pm011234	vs.	ppa008801m	0	0.0325	0.0314	1.03503	1.04667
PmNAC041	Pm011397	vs.	ppa026810m	0	0.0037	0.073	0.0506849	2.43333
PmNAC042	Pm011603	vs.	ppa007314m	3e-75	0.8043	3.7646	0.213648	125.487
PmNAC047	Pm012336	vs.	ppa020620m	0	0.0112	0.0452	0.247788	1.50667
PmNAC048	Pm012630	vs.	ppa009438m	0	0.0102	0.0563	0.181172	1.87667
PmNAC049	Pm012993	vs.	ppa002384m	0	0.0111	0.0569	0.195079	1.89667
PmNAC053	Pm014764	vs.	ppa022043m	0	0.014	0.0753	0.185923	2.51
PmNAC054	Pm015625	vs.	ppa007898m	0	0.0228	0.0627	0.363636	2.09
PmNAC055	Pm015876	vs.	ppa016710m	0	0.0076	0.0359	0.211699	1.19667
PmNAC056	Pm015914	vs.	ppa007653m	6e-136	0.2675	1.5631	0.171134	52.1033
PmNAC057	Pm016114	vs.	ppa026582m	1e-159	0.0165	0.0321	0.514019	1.07
PmNAC060	Pm018292	vs.	ppa020746m	0	0.0076	0.04	0.19	1.33333
PmNAC061	Pm018442	vs.	ppa023197m	6e-123	0.0362	0.0354	1.0226	1.18
PmNAC064	Pm019488	vs.	ppa015786m	9e-133	0.2315	1.5259	0.151714	50.8633
PmNAC066	Pm019659	vs.	ppa007076m	0	0.0433	0.0431	1.00464	1.43667
PmNAC067	Pm020580	vs.	ppa009628m	0	0.0075	0.0508	0.147638	1.69333
PmNAC068	Pm020961	vs.	ppa009455m	0	0.0148	0.0487	0.303901	1.62333
PmNAC069	Pm021749	vs.	ppa018222m	2e-134	0.0116	0.0728	0.159341	2.42667
PmNAC070	Pm021768	vs.	ppa019438m	0	0.0385	0.1054	0.365275	3.51333
PmNAC071	Pm021945	vs.	ppa024439m	9e-169	0.0123	0.064	0.192188	2.13333
PmNAC077	Pm022820	vs.	ppa026376m	0	0.0091	0.0717	0.126918	2.39
PmNAC078	Pm022916	vs.	ppa022238m	0	0.0149	0.0464	0.321121	1.54667
PmNAC079	Pm023277	vs.	ppa007828m	0	0.0296	0.0388	0.762887	1.29333
PmNAC080	Pm023559	vs.	ppa015786m	0	0.0124	0.0419	0.295943	1.39667
PmNAC081	Pm024260	vs.	ppa006801m	0	0.0011	0.0444	0.0247748	1.48
PmNAC082	Pm024558	vs.	ppa027024m	3e-154	0.0111	0.0901	0.123196	3.00333
PmNAC083	Pm024887	vs.	ppa007653m	0	0.0169	0.0209	0.808612	0.696667
PmNAC085	Pm025184	vs.	ppa006896m	7e-123	0.0639	0.1119	0.571046	3.73
PmNAC086	Pm025307	vs.	ppa005770m	0	0.0157	0.0619	0.253635	2.06333
PmNAC087	Pm025312	vs.	ppa007445m	0	0.0106	0.0415	0.255422	1.38333
PmNAC088	Pm025886	vs.	ppa026190m	0	0.0296	0.0472	0.627119	1.57333
PmNAC089	Pm025887	vs.	ppa018568m	0	0.0334	0.0298	1.12081	0.993333
PmNAC092	Pm027280	vs.	ppa004775m	0	0.0026	0.0462	0.0562771	1.54
PmNAC093	Pm028056	vs.	ppa025103m	1e-138	0.007	0.0236	0.29661	0.786667
PmNAC097	Pm028678	vs.	ppa018550m	0	0.0404	0.0646	0.625387	2.15333
PmNAC098	Pm028710	vs.	ppa016876m	7e-85	0.24	0.385	0.623377	12.8333
PmNAC101	Pm028713	vs.	ppa012785m	4e-88	0.0692	0.0972	0.711934	3.24
PmNAC107	Pm028721	vs.	ppa020233m	0	0.1182	0.2139	0.552595	7.13
PmNAC110	Pm029010	vs.	ppa005648m	0	0.013	0.0334	0.389222	1.11333
PmNAC112	Pm030099	vs.	ppa015363m	0	0.0114	0.0426	0.267606	1.42
Ka: non-synonymous; Ks: synonymous; Mya: million years ago

## Sheet: Table S4
Supplementary Table S4 Typical NAC protein in Arabidopsis thaliana.
Species	Genebank ID	Nomenclature	Alias	Length
Arabidopsis thaliana	AT1G01010.1	ANAC001		429
Arabidopsis thaliana	AT1G01720.1	ANAC002	ATAF1	289
Arabidopsis thaliana	AT1G02220.1	ANAC003		394
Arabidopsis thaliana	AT1G02230.1	ANAC004		359
Arabidopsis thaliana	AT1G02250.1	ANAC005		362
Arabidopsis thaliana	AT1G03490.1	ANAC006		281
Arabidopsis thaliana	AT1G12260.1	ANAC007	VND4	395
Arabidopsis thaliana	AT1G25580.1	ANAC008	SOG1	449
Arabidopsis thaliana	AT1G26870.1	ANAC009	FEZ	425
Arabidopsis thaliana	AT1G28470.1	ANAC010	SND3	314
Arabidopsis thaliana	AT1G32510.1	ANAC011		283
Arabidopsis thaliana	AT1G32770.1	ANAC012	SND1	358
Arabidopsis thaliana	AT1G32870.1	ANAC013		528
Arabidopsis thaliana	AT1G33060.2	ANAC014		652
Arabidopsis thaliana	AT1G33280.1	ANAC015	BRN1	305
Arabidopsis thaliana	AT1G34180.2	ANAC016		576
Arabidopsis thaliana	AT1G34190.1	ANAC017		557
Arabidopsis thaliana	AT1G52880.1	ANAC018	NAM	320
Arabidopsis thaliana	AT1G52890.1	ANAC019		317
Arabidopsis thaliana	AT1G54330.1	ANAC020		301
Arabidopsis thaliana	AT1G56010.1	ANAC021	NAC1	257
Arabidopsis thaliana	AT1G56010.2	ANAC022	NAC1	324
Arabidopsis thaliana	AT1G60280.1	ANAC023		347
Arabidopsis thaliana	AT1G60350.1	ANAC024		320
Arabidopsis thaliana	AT1G61110.1	ANAC025		323
Arabidopsis thaliana	AT1G62700.1	ANAC026	VND5	394
Arabidopsis thaliana	AT1G64105.1	ANAC027		161
Arabidopsis thaliana	AT1G65910.1	ANAC028		631
Arabidopsis thaliana	AT1G69490.1	ANAC029	NAP	268
Arabidopsis thaliana	AT1G71930.1	ANAC030	VND7	324
Arabidopsis thaliana	AT1G76420.1	ANAC031	CUC3	334
Arabidopsis thaliana	AT1G77450.1	ANAC032		253
Arabidopsis thaliana	AT1G79580.1	ANAC033	SMB	371
Arabidopsis thaliana	AT2G02450.1	ANAC034		379
Arabidopsis thaliana	AT2G02450.2	ANAC035		414
Arabidopsis thaliana	AT2G17040.1	ANAC036		276
Arabidopsis thaliana	AT2G18060.1	ANAC037	VND1	365
Arabidopsis thaliana	AT2G24430.1	ANAC038		316
Arabidopsis thaliana	AT2G24430.2	ANAC039		316
Arabidopsis thaliana	AT2G27300.1	ANAC040		335
Arabidopsis thaliana	AT2G33480.1	ANAC041		268
Arabidopsis thaliana	AT2G43000.1	ANAC042		275
Arabidopsis thaliana	AT2G46770.1	ANAC043	NST1	365
Arabidopsis thaliana	AT3G01600.1	ANAC044		370
Arabidopsis thaliana	AT3G03200.1	ANAC045		479
Arabidopsis thaliana	AT3G04060.1	ANAC046		338
Arabidopsis thaliana	AT3G04070.1	ANAC047		359
Arabidopsis thaliana	AT3G04420.1	ANAC048		342
Arabidopsis thaliana	AT3G04430.1	ANAC049		198
Arabidopsis thaliana	AT3G10480.3	ANAC050		526
Arabidopsis thaliana	AT3G10490.1	ANAC051		238
Arabidopsis thaliana	AT3G10490.2	ANAC052		451
Arabidopsis thaliana	AT3G10500.1	ANAC053		549
Arabidopsis thaliana	AT3G15170.1	ANAC054	CUC1	310
Arabidopsis thaliana	AT3G15500.1	ANAC055	ATNAC3	317
Arabidopsis thaliana	AT3G15510.1	ANAC056	ATNAC2	364
Arabidopsis thaliana	AT3G17730.1	ANAC057		246
Arabidopsis thaliana	AT3G18400.1	ANAC058		314
Arabidopsis thaliana	AT3G29035.1	ANAC059	ATNAC3	318
Arabidopsis thaliana	AT3G44290.1	ANAC060		335
Arabidopsis thaliana	AT3G44350.2	ANAC061		241
Arabidopsis thaliana	AT3G49530.1	ANAC062	NTL6	469
Arabidopsis thaliana	AT3G55210.1	ANAC063		280
Arabidopsis thaliana	AT3G56530.1	ANAC064		319
Arabidopsis thaliana	AT3G56560.1	ANAC065		228
Arabidopsis thaliana	AT3G61910.1	ANAC066	NST2	334
Arabidopsis thaliana	AT4G01520.1	ANAC067		302
Arabidopsis thaliana	AT4G01540.1	ANAC068	NTM1	473
Arabidopsis thaliana	AT4G01550.1	ANAC069		457
Arabidopsis thaliana	AT4G10350.1	ANAC070	BRN2	341
Arabidopsis thaliana	AT4G17980.1	ANAC071		262
Arabidopsis thaliana	AT4G27410.3	ANAC072	RD26	314
Arabidopsis thaliana	AT4G28500.1	ANAC073	SND2	305
Arabidopsis thaliana	AT4G28530.1	ANAC074		352
Arabidopsis thaliana	AT4G29230.1	ANAC075		498
Arabidopsis thaliana	AT4G36160.1	ANAC076	VND2	377
Arabidopsis thaliana	AT5G04400.1	ANAC077		395
Arabidopsis thaliana	AT5G04410.1	ANAC078	NAC2	567
Arabidopsis thaliana	AT5G07680.1	ANAC079		329
Arabidopsis thaliana	AT5G07680.2	ANAC080		315
Arabidopsis thaliana	AT5G08790.1	ANAC081	ATAF2	283
Arabidopsis thaliana	AT5G09330.1	ANAC082	VNI1	489
Arabidopsis thaliana	AT5G13180.1	ANAC083	VNI2	252
Arabidopsis thaliana	AT5G14000.1	ANAC084		206
Arabidopsis thaliana	AT5G14490.1	ANAC085		350
Arabidopsis thaliana	AT5G17260.1	ANAC086		476
Arabidopsis thaliana	AT5G18270.1	ANAC087		335
Arabidopsis thaliana	AT5G18300.1	ANAC088		147
Arabidopsis thaliana	AT5G22290.1	ANAC089		340
Arabidopsis thaliana	AT5G22380.1	ANAC090		235
Arabidopsis thaliana	AT5G24590.2	ANAC091	TIP	451
Arabidopsis thaliana	AT5G39610.1	ANAC092	ORE1	285
Arabidopsis thaliana	AT5G39690.1	ANAC093		294
Arabidopsis thaliana	AT5G39820.1	ANAC094		337
Arabidopsis thaliana	AT5G41090.1	ANAC095		212
Arabidopsis thaliana	AT5G46590.1	ANAC096		292
Arabidopsis thaliana	AT5G50820.1	ANAC097		193
Arabidopsis thaliana	AT5G53950.1	ANAC098	CUC2	375
Arabidopsis thaliana	AT5G56620.1	ANAC099		386
Arabidopsis thaliana	AT5G61430.1	ANAC100	ATNAC5	336
Arabidopsis thaliana	AT5G62380.1	ANAC101	VND6	348
Arabidopsis thaliana	AT5G63790.1	ANAC102		312
Arabidopsis thaliana	AT5G64060.1	ANAC103		356
Arabidopsis thaliana	AT5G64530.1	ANAC104	XND1	187
Arabidopsis thaliana	AT5G66300.1	ANAC105	VND3	292

## Sheet: Table S5
Supplementary Table S5 Identification of mature miRNA164s and targeted NAC genes in Prunus mume.
miRNA_Acc.	Arm	location	Target_Acc.	Expectation	UPE	miRNA_start	miRNA_end	Target_start	Target_end	miRNA_aligned_fragment	Target_aligned_fragment	Inhibition	Target_Desc.	Multiplicity
Pmu-miR164h	3P	scaffold831:228360:228477:+	Pm011234	2.5	17.139	1	21	324	344	CAUGUGCCCUUCUUCUCCAUC	AAUGGAGAAGCAGGGCACUUG	Translation	PmNAC040, ANAC022, NAC1	1
Pmu-miR164c	3P	scaffold132:482413:482531:+	Pm011234	2.5	17.139	1	21	324	344	CAUGUGCCCUUCUUCUCCAUC	AAUGGAGAAGCAGGGCACUUG	Translation	PmNAC040, ANAC022, NAC1	1
Pmu-miR164b	3P	scaffold54:111549:111667:-	Pm011234	3	17.139	1	21	324	344	CAUGUGCCUUUCUUCUCCACC	AAUGGAGAAGCAGGGCACUUG	Translation	PmNAC040, ANAC022, NAC1	1
Pmu-miR164a	3P	scaffold22:168583:168784:+	Pm011234	2.5	17.139	1	21	324	344	CAUGUGCCCUUCUUCUCCACC	AAUGGAGAAGCAGGGCACUUG	Translation	PmNAC040, ANAC022, NAC1	1
Pmu-miR164e	5P	scaffold57:506643:506736:-	Pm011397	0.5	14.116	1	21	719	739	UGGAGAAGCAGGACACGUGAG	AGCACGUGUCCUGUUUCUCCA	Cleavage	PmNAC041, ANAC098, CUC2	1
Pmu-miR164c	5P	scaffold132:482413:482531:+	Pm011397	0.5	14.116	1	21	719	739	UGGAGAAGCAGGACACGUGAG	AGCACGUGUCCUGUUUCUCCA	Cleavage	PmNAC041, ANAC098, CUC2	1
Pmu-miR164b	3P	scaffold54:111549:111667:-	Pm011397	2.5	22.007	1	21	327	347	CACGUGUUCUCCUUCUCCAAC	GGUGGAGAAACAGGACACGUG	Translation	PmNAC041, ANAC098, CUC2	1
Pmu-miR164a	3P	scaffold22:168583:168784:+	Pm011397	2.5	22.007	1	21	327	347	CACGUGUUCUCCUUCUCCAUC	GGUGGAGAAACAGGACACGUG	Translation	PmNAC041, ANAC098, CUC2	1
Pmu-miR164h	3P	scaffold831:228360:228477:+	Pm024887	2.5	17.525	1	21	420	440	CAUGUGCCCUUCUUCUCCAUC	GUUGGAGAAGCAGGGCACGUA	Translation	PmNAC083, ANAC100, ATNAC5	1
Pmu-miR164c	3P	scaffold132:482413:482531:+	Pm024887	2.5	17.525	1	21	420	440	CAUGUGCCCUUCUUCUCCAUC	GUUGGAGAAGCAGGGCACGUA	Translation	PmNAC083, ANAC100, ATNAC5	1
Pmu-miR164a	5P	scaffold22:168583:168784:+	Pm024887	3	17.525	1	21	420	440	CACGUGCGCUCCUUCUCCAGC	GUUGGAGAAGCAGGGCACGUA	Translation	PmNAC083, ANAC100, ATNAC5	1

## Sheet: Table S6
Supplementary Table S6 Expression profiles of 76 PmNAC genes in five different tissues(root, stem, leaf, bud and fruit) (FPKM).
Cluster I
Gene name	Alias of A. thaliana	Subfamily	Root	Stem	Leaf	Bud	Fruit
PmNAC034		VI	1.27289	2.09532	1.06086	0.685639	0.384499
PmNAC076		I	8.98619	12.9229	8.02429	3.63028	5.68737
PmNAC049		VI	1.15951	3.81735	2.1053	0.356894	0.833926
PmNAC105		IX	1.70391	6.14903	3.35495	0.481847	2.36759
PmNAC014		II	0.753128	31.773	15.6735	3.72261	2.4623
PmNAC074		I	6.69641	14.5358	10.7633	4.63756	3.73029
PmNAC091	VND1	VII	1.79316	3.74644	2.59197	2.98819	1.62496
PmNAC079		I	4.63883	5.88768	2.18323	3.88032	0.923168
PmNAC082	VNI2	V	4.58636	13.082	0.804716	5.72098	1.36108
PmNAC065	VND4	VII	0.586715	3.07974	0.533438	0.517142	0.515569
PmNAC081	NST1	VII	2.43098	64.3887	0	1.84862	0.748718
PmNAC092		III	4.69743	10.5895	2.88809	3.17318	3.02396
PmNAC060	NST1	VII	6.47953	33.4606	0.234792	2.88319	2.09908
PmNAC078	CUC3	VI	0.979748	5.30758	0	0.688353	0.102939
PmNAC030	SND2	III	15.5125	53.4398	7.69794	35.4961	78.1924
PmNAC097		IX	1.06374	1.29307	0.0886551	0.401086	1.41381
PmNAC064	VND4	VII	0.234619	1.51513	0.806596	1.04261	1.13393
PmNAC016	XND1	IV	1.92874	9.35031	0	1.33574	3.99503
PmNAC054	SND2	III	11.2048	18.9261	12.0488	13.5105	16.4496
Cluster II
Gene name	Alias of A. thaliana	Subfamily	Root	Stem	Leaf	Bud	Fruit
PmNAC059	NAC2	X	87.0367	68.9815	72.9636	78.148	83.5303
PmNAC098		VIII	20.0628	4.7452	7.64926	5.1051	22.9908
PmNAC042	ATNAC3	IV	120.372	21.7625	851.523	776.84	1502.57
PmNAC025	VNI2	V	109.044	164.806	434.952	310.713	905.061
PmNAC087		IV	13.3509	7.87681	63.6441	99.4944	325.761
PmNAC040	NAC1	VI	39.3336	17.5108	46.4671	41.0915	141.204
PmNAC099		VIII	3.2816	1.80755	4.15375	3.97715	23.9886
PmNAC102		IX	0.0993573	0	0	0	1.50063
PmNAC063		VIII	1.40671	0.657682	0.676377	1.57372	2.48414
PmNAC067		VI	3.83171	8.43217	0.991071	83.9095	130.989
PmNAC100	NTL6	VIII	2.95872	2.39383	2.54594	5.27784	8.40338
PmNAC041	CUC2	VI	0.0528882	1.12508	0	2.39299	0.958546
PmNAC044	VND6	XII	0.775888	0.943159	0.323323	1.92247	0.499989
PmNAC029		IV	9.76935	0.539796	1.44336	22.2448	13.5209
PmNAC043	ATNAC2	IV	0.0506135	0.461438	0	112.704	3.85274
PmNAC084		III	0	0	0.503485	4.71835	0.48662
PmNAC083	ATNAC5	VI	14.0299	0.316999	3.0645	190.136	44.7428
PmNAC112		IV	0.369181	0.240413	0.659326	7.585	3.1862
PmNAC072	VND7	VII	1.61031	1.22342	2.47768	3.40282	1.12251
PmNAC019	XND1	II	4.47337	3.85514	7.2617	5.17876	4.92099
PmNAC068		II	2.45025	1.76358	15.7994	10.5238	11.2189
Cluster III
Gene name	Alias of A. thaliana	Subfamily	Root	Stem	Leaf	Bud	Fruit
PmNAC106		IX	7.04485	0.446023	0.314538	0.0677622	0.405336
PmNAC066	TIP	VIII	253.409	51.9551	53.507	50.9858	54.7397
PmNAC024	FEZ	II	1.67275	0	0	0	0
PmNAC077	BRN2	VII	4.22268	0	0	0	0
PmNAC018		VI	15.2706	0	0	0	0
PmNAC055	FEZ	II	1.56507	0	0	0	0
PmNAC011		II	241.751	3.12913	44.4095	33.8718	28.7923
PmNAC048	ATAF1	III	1072.05	22.0447	191.689	75.8546	110.787
PmNAC035		II	1.87696	0	0.293308	0	0.566966
PmNAC057		III	311.536	8.41446	105.327	44.3594	79.3365
PmNAC061		VIII	57.4479	20.0929	7.55403	13.0192	11.0044
PmNAC062		VIII	1.33752	0.625337	0.51449	0.498774	0.497257
PmNAC108		IX	2.15796	0.573823	0.202332	0.871783	0.586663
PmNAC086		VI	74.6109	7.02681	14.2983	21.0174	13.071
PmNAC101		VIII	5.49156	0.794699	0.891588	2.22811	1.17769
PmNAC022	NAP	II	5.58181	3.16473	3.22865	2.28862	0.603969
PmNAC085		VI	17.9695	16.3826	14.8305	13.7736	14.3337
PmNAC107		IX	6.19883	4.22535	0.796668	0.187232	1.25997
Cluster IV
Gene name	Alias of A. thaliana	Subfamily	Root	Stem	Leaf	Bud	Fruit
PmNAC031		II	14.2403	0	17.2065	2.59962	23.7574
PmNAC023	NAP	IV	100.07	13.5621	1945.75	336.993	2641.15
PmNAC056	ATNAC5	VI	4.86752	1.13786	368.048	184.194	451.694
PmNAC093		II	0.219785	0.11132	11.0821	3.07804	9.82566
PmNAC090		I	4.9745	11.5412	12.772	4.92681	11.9564
PmNAC109		IX	2.39128	3.32754	3.90201	2.39985	6.38689
PmNAC058		X	33.4267	57.0844	73.8452	49.1265	88.2297
PmNAC075		I	13.2118	16.9054	20.0607	13.8296	21.5215
PmNAC020		X	66.1691	37.8717	117.014	12.8691	23.8187
PmNAC080	VND4	VII	2.78936	2.1192	5.542	0.08049	2.04625
PmNAC110	SOG1	III	42.3195	27.6733	54.6652	13.2222	28.7558
PmNAC033	SMB	VII	1.05909	0	7.20849	0	3.98116
PmNAC111		VIII	24.4192	30.7246	53.4576	13.7842	40.399
PmNAC021	NAP	II	17.1091	2.23898	19.342	7.80473	5.14336
PmNAC103		IX	1.12647	0.672438	0.905305	0.390067	0.72915
PmNAC053		II	5.96842	0	4.15375	1.392	4.60937
PmNAC017	ATAF1	III	219.832	20.9736	213.193	68.9707	143.645
PmNAC073		V	68.4721	25.4414	69.3107	23.319	53.0166

## Sheet: Table S7
Supplementary Table S7 Expression profiles of PmNAC genes during the process of flower bud dormancy release (FPKM).
Cluster I
Gene name	Alias of A. thaliana	Subfamily	Nov.	Dec.	Jan.	Feb.
PmNAC075		I	35.0943	37.283	39.9719	24.2871
PmNAC079		I	17.6078	17.6493	22.7395	6.98582
PmNAC078	CUC3	VI	10.1764	9.10416	9.15835	4.51226
PmNAC103		IX	3.79669	3.50864	3.65275	1.85441
PmNAC041	CUC2	VI	33.727	32.3924	34.7409	9.45589
PmNAC074		I	19.9043	20.2823	19.4202	13.2693
PmNAC085		VI	41.3649	42.2269	41.138	19.9986
PmNAC011		II	5.07264	3.59865	3.77308	0.435878
PmNAC048	ATAF1	III	39.4824	30.9595	38.0035	15.7751
PmNAC086		VI	15.9717	14.9056	10.634	5.83641
PmNAC111		VIII	52.3654	53.5266	46.9371	32.2119
PmNAC023	NAP	IV	46.6043	54.1939	36.7793	18.4465
PmNAC058		X	60.8444	66.5533	52.8839	38.946
PmNAC020		X	17.4297	24.248	21.1484	11.1556
PmNAC019	XND1	II	10.9041	12.0332	11.859	7.94329
PmNAC076		I	11.155	12.3103	11.3751	7.33967
PmNAC093		II	0.724427	2.1952	0.315728	0.736006
PmNAC056	ATNAC5	VI	8.87985	13.2822	4.48518	9.8916
PmNAC101		VIII	6.86605	7.91653	4.88847	6.53838
PmNAC090		I	12.3329	17.3927	15.5526	12.2874
PmNAC073		V	33.4865	41.8703	34.9916	30.8582
PmNAC025	VNI2	V	83.9772	150.811	108.822	90.2117
PmNAC057		III	2.08205	3.76641	2.56074	2.00493
PmNAC059	NAC2	X	127.844	141.369	132.977	134.878
PmNAC100	NTL6	VIII	4.70897	7.85377	7.09949	6.62968
Cluster II
Gene name	Alias of A. thaliana	Subfamily	Nov.	Dec.	Jan.	Feb.
PmNAC109		IX	1.93739	1.08447	1.61242	0.79435
PmNAC066	TIP	VIII	93.446	66.975	71.2637	38.9375
PmNAC092		III	3.59857	2.60874	2.76387	1.97111
PmNAC102		IX	7.39125	4.33198	4.80278	2.41023
PmNAC017	ATAF1	III	701.34	306.484	331.393	44.2627
PmNAC042	ATNAC3	IV	617.981	289.95	316.056	58.0687
PmNAC018		VI	2.24635	0.851875	0.343826	0.390617
PmNAC068		II	6.67933	2.93914	3.30942	2.66701
PmNAC107		IX	13.4634	6.56431	7.04935	5.07122
PmNAC044	VND6	XII	2.83894	0.665719	1.09896	1.1124
PmNAC105		IX	5.46976	2.94686	3.39881	3.58204
PmNAC106		IX	3.96511	1.91345	1.48285	2.47686
PmNAC108		IX	3.30156	1.38424	1.29335	2.1567
Cluster III
Gene name	Alias of A. thaliana	Subfamily	Nov.	Dec.	Jan.	Feb.
PmNAC098		VIII	3.32721	3.95292	3.4386	4.67393
PmNAC021	NAP	II	7.26506	9.21156	7.68071	9.11058
PmNAC110	SOG1	III	14.1505	17.1441	13.204	18.0248
PmNAC061		VIII	25.7852	20.8739	22.3386	40.1531
PmNAC014		II	2.58664	1.73513	1.76179	4.20581
PmNAC040	NAC1	VI	4.05532	2.35272	2.01739	8.36859
PmNAC083	ATNAC5	VI	2.68862	3.42663	1.85873	13.2633
PmNAC029		IV	3.44879	4.97047	4.26355	37.2731
PmNAC030	SND2	III	6.07067	7.57191	7.05536	39.1678
PmNAC081	NST1	VII	0.0297742	0.0141894	0.0909767	8.92277
PmNAC087		IV	0.523355	0.526644	0.792794	21.2883
PmNAC031		II	0.1999	0.248789	0.14759	5.33257
PmNAC095	NAP	IV	0.0146555	0.029348	0	1.61956
PmNAC047		IV	0.0151404	0	0	5.28651
PmNAC088		III	0	0	0	1.17982
PmNAC089	ATAF2	III	0	0	0	1.10267
PmNAC027	NAP	IV	0	0.0174062	0	5.81285
PmNAC084		III	0	0.0301327	0	4.43535
PmNAC043	ATNAC2	IV	4.15698	1.90573	3.68243	53.2382
PmNAC060	NST1	VII	0.144985	0.13992	0.411841	5.33586
PmNAC022	NAP	II	1.58349	3.99208	4.95348	7.21323
PmNAC064	VND4	VII	0.447244	0.728153	0.846106	1.3476
PmNAC082	VNI2	V	1.27504	1.9007	3.69663	9.27557
PmNAC049		VI	1.68333	1.60271	2.44739	3.51499
PmNAC067		VI	8.51116	7.17063	11.6075	16.1109
Cluster IV
Gene name	Alias of A. thaliana	Subfamily	Nov.	Dec.	Jan.	Feb.
PmNAC006		XIII	1.2792	1.12234	2.05563	1.48229
PmNAC034		VI	0.976	1.10664	1.83368	1.3257
PmNAC054	SND2	III	20.3929	25.7145	29.5819	25.9859
PmNAC072	VND7	VII	0.719301	1.08542	1.51712	1.54413
PmNAC080	VND4	VII	1.11786	1.77958	3.27496	3.23619
PmNAC009	VNI2	XIII	0.960526	0.683338	1.12958	0.744485
PmNAC091	VND1	VII	7.95502	8.96616	10.6214	7.5303
PmNAC112		IV	0.580166	0.792956	1.23921	0.31034

## Sheet: Table S8
Supplementary Table S8 Expression profiles of 62 PmNAC genes in different regions and seasons (FPKM).
Cluster I				Autumn (Oct.)			Winter (Jan.)			Spring (Mar.)
Gene name	Alias of A.thaliana	Subfamily	BJ-2_FPKM	CF-2_FPKM	GZL-2_FPKM	BJ-3_FPKM	CF-3_FPKM	GZL-3_FPKM	BJ-1_FPKM	CF-1_FPKM	GZL-1_FPKM
PmNAC019	XND1	II	4.30663	4.3198	9.3525	5.01391	3.34372	7.04263	4.45836	9.72612	5.48122
PmNAC106		IX	0.718793	0.386407	1.28047	0.490418	0.730718	1.54469	0.538069	1.51918	1.22812
PmNAC057		III	11.3663	6.48906	36.8074	17.4777	15.5648	22.1036	18.649	9.7336	42.637
PmNAC031		II	0.571371	0	2.62326	0.420719	0.598571	2.66999	0.213473	6.52228	14.9671
PmNAC053		II	0.395085	0.322072	0.890364	0.230899	0.0937274	1.94904	0.847419	3.16746	3.83195
PmNAC087		IV	3.07561	3.58921	16.5799	4.27388	2.5124	1.79076	3.98045	13.948	27.045
PmNAC108		IX	0.467083	0.139372	1.17498	0.311866	0.588495	0.471961	0.363137	1.46435	1.21517
Cluster II				Autumn (Oct.)			Winter (Jan.)			Spring (Mar.)
Gene name	Alias of A.thaliana	Subfamily	BJ-2_FPKM	CF-2_FPKM	GZL-2_FPKM	BJ-3_FPKM	CF-3_FPKM	GZL-3_FPKM	BJ-1_FPKM	CF-1_FPKM	GZL-1_FPKM
PmNAC090		I	9.09798	13.637	10.0018	20.1035	6.17717	14.5341	17.0255	15.6314	15.3392
PmNAC025	VNI2	V	64.1542	42.2981	56.3742	366.35	78.2021	37.2831	259.928	148.438	99.0273
PmNAC100	NTL6	VIII	3.38177	2.63687	1.83822	7.17308	2.43044	1.66963	3.80393	3.35803	2.09058
PmNAC061		VIII	11.5713	13.6446	7.92207	5.48579	7.59964	10.0024	13.9412	49.8496	21.5502
PmNAC049		VI	0.954294	0.548787	0.649165	1.12368	0.282606	0.700351	0.684958	2.0594	1.3272
PmNAC097		IX	2.90021	2.65753	3.21048	4.51787	2.68895	3.01513	3.22669	8.00908	4.70049
PmNAC109		IX	0.918791	1.01544	1.09444	1.45593	0.756778	0.0963088	1.00884	4.2191	1.79373
PmNAC082	VNI2	V	3.01061	0.22003	1.09934	3.53816	2.82802	0	4.93923	7.34596	0.923467
PmNAC098		VIII	3.10661	2.95242	2.97889	5.07349	2.72525	1.82073	4.49448	6.7568	4.24469
PmNAC079		I	13.8413	30.6578	4.54377	23.2868	14.3159	10.382	32.3835	29.3189	61.4041
PmNAC014		II	4.03625	2.76183	3.90427	3.69063	1.81462	2.66225	6.78164	6.40956	3.94712
PmNAC034		VI	0.601188	0.243709	0.169632	0.337401	0	0	1.75521	0.624445	0.801161
PmNAC054	SND2	III	7.51147	7.43378	7.95339	9.16102	8.14063	7.41075	12.6952	16.5348	11.5261
PmNAC110	SOG1	III	5.0683	3.09743	5.41473	4.53398	4.85943	5.90752	8.01119	9.76729	6.80489
PmNAC041	CUC2	VI	0.401643	1.07584	0.846662	0.502529	1.75006	0	7.40063	6.15039	2.44395
PmNAC068		II	2.057	3.09862	1.24661	1.67233	6.39757	3.97417	14.3496	10.9754	11.069
Cluster III				Autumn (Oct.)			Winter (Jan.)			Spring (Mar.)
Gene name	Alias of A.thaliana	Subfamily	BJ-2_FPKM	CF-2_FPKM	GZL-2_FPKM	BJ-3_FPKM	CF-3_FPKM	GZL-3_FPKM	BJ-1_FPKM	CF-1_FPKM	GZL-1_FPKM
PmNAC020		X	65.9403	51.0228	71.5489	34.5753	44.1375	114.617	38.7417	34.8569	32.2566
PmNAC101		VIII	2.68178	2.93798	3.40682	1.55792	2.05853	4.58233	2.30347	1.84519	2.14826
PmNAC056	ATNAC5	VI	9.81432	8.57712	14.9378	5.34335	6.92917	13.9275	0.896523	1.49494	1.93564
PmNAC017	ATAF1	III	238.898	419.309	808.935	269.718	636.809	750.517	15.7865	37.7191	89.23
PmNAC042	ATNAC3	IV	312.563	740.111	971.034	403.063	558.223	956.353	64.5214	41.4987	92.2749
PmNAC099		VIII	1.34981	0.266032	0.618757	1.70271	1.38097	2.29947	0.967306	1.41909	0.926689
PmNAC021	NAP	II	0.979863	0.758989	0.540263	0.645286	1.36745	9.06849	0	0.175313	0.247981
PmNAC012		II	3.614	0	0	10.4001	96.8288	177.488	1.23632	0.0908994	0
PmNAC011		II	10.534	13.1732	1.96054	7.25835	91.9944	255.152	4.2774	2.12207	1.39189
PmNAC048	ATAF1	III	12.3639	24.2639	46.5575	16.765	204.596	439.066	8.06418	23.4023	28.65
PmNAC066	TIP	VIII	115.029	80.0253	20.7178	96.0145	140.946	246.944	33.2471	15.7201	21.5818
PmNAC030	SND2	III	13.2223	11.2253	10.7481	13.5246	9.17735	22.5539	5.0901	4.10812	2.13897
PmNAC086		VI	19.5316	18.9196	17.6267	14.8135	15.7307	33.9747	9.97166	9.82469	7.09153
Cluster IV				Autumn (Oct.)			Winter (Jan.)			Spring (Mar.)
Gene name	Alias of A.thaliana	Subfamily	BJ-2_FPKM	CF-2_FPKM	GZL-2_FPKM	BJ-3_FPKM	CF-3_FPKM	GZL-3_FPKM	BJ-1_FPKM	CF-1_FPKM	GZL-1_FPKM
PmNAC018		VI	2.49694	1.06535	0.757939	0.83635	0.999474	0.382825	0.707869	0.469153	0.0736763
PmNAC091	VND1	VII	1.01859	0.827505	0.669762	0.730018	1.2208	0	0.174044	0.611906	0.357591
PmNAC074		I	24.3198	26.623	25.749	36.7707	30.7646	25.2719	28.0974	18.66	24.5085
PmNAC085		VI	19.621	20.9736	14.8534	20.0148	20.4185	15.6659	9.60444	6.46369	8.34969
PmNAC093		II	1.60015	1.28947	0.75114	1.34771	1.15763	0.701063	0.4217	0.274441	0.386922
PmNAC111		VIII	65.6829	60.7099	60.2868	74.0321	55.7332	71.1688	37.3554	31.5113	27.9807
PmNAC029		Cluster III	52.4953	51.1901	35.4736	56.5035	32.3252	62.4036	20.5802	12.5238	14.9282
PmNAC073		V	54.436	51.6742	46.2168	61.2873	39.2196	58.4926	27.396	27.818	32.9693
PmNAC059	NAC2	X	173.777	204.452	132.219	239.584	181.987	210.886	94.2554	57.509	74.4471
PmNAC075		I	37.1645	42.0452	28.5442	58.1297	38.937	36.548	23.1249	19.4007	19.3048
PmNAC065	VND4	VII	0.851914	0.849944	2.34398	1.59528	0.233177	0.0608364	0.505888	0.0900053	0.0382291
PmNAC102		IX	7.29139	5.50497	11.4454	10.042	6.45295	5.44114	4.69791	5.61019	3.77626
PmNAC058		X	52.8816	55.5314	63.9864	54.0191	34.6431	48.1759	32.5927	27.6411	32.3684
PmNAC063		VIII	2.3771	2.07229	3.59975	2.12909	1.01059	1.38717	0.889955	0.930586	0.435358
PmNAC092		III	4.99407	4.35122	7.71281	2.98116	2.00093	4.13044	2.33817	2.22887	1.45676
PmNAC064	VND4	VII	0.129697	0.17887	2.0509	0.230544	0.371286	1.39697	0.466462	0.712462	0.0511106
PmNAC103		IX	2.51885	1.76026	4.97982	4.27825	2.82149	4.12214	2.51784	2.66264	2.53571
PmNAC023	NAP	IV	70.7628	78.6806	437.627	75.6255	79.3745	107.243	21.0353	6.90408	33.5798
PmNAC107		IX	3.59794	7.49344	18.1159	5.11855	9.47463	4.07189	3.53527	4.16967	4.12217
PmNAC040	NAC1	VI	1.52677	4.48719	18.1265	1.29521	5.16002	3.81831	2.23353	6.5567	4.49894
PmNAC105		IX	1.7184	2.58215	7.16966	1.95816	1.69625	1.50389	2.13323	4.97035	2.49727
PmNAC076		I	12.6715	12.6154	14.344	12.4764	10.0479	11.5561	13.9845	15.4637	10.1612
PmNAC078	CUC3	VI	1.1141	0.727684	1.57958	0.634926	0.608256	0.396788	1.36692	1.00524	0.299746
PmNAC083	ATNAC5	VI	5.94416	4.97837	7.0945	6.06133	3.30844	4.58241	5.86954	5.35467	3.90597
PmNAC043	ATNAC2	IV	52.3403	60.3806	41.0052	40.9787	24.4899	25.5754	59.9287	4.99001	14.4248
PmNAC067		VI	6.5033	5.37711	6.23809	2.84629	4.12676	6.93161	7.96141	5.40584	1.31074

## Sheet: Table S9
Supplementary Table S9 Details of putative candidate genes for quantitative RT-PCR
Gene name	Nomenclature	At orthologous	Tissue-specific experession (FPKM)			Flower bud(FPKM)		Time-specific expression of stem in GZL (FPKM)			Special characteristic
			Root	Stem	Leaf	Nov.	Dec.	Oct. (7.9 °C)	Jan. (-22..4 °C)	Apr. (5.3 °C)
PmNAC011	Pm001403	ANAC090	241.751	3.12913	44.4095	5.07264	3.59865	1.96054	255.152	1.39189	-
PmNAC020	Pm005783	ANAC028	66.1691	37.8717	117.014	17.4297	24.248	71.5489	114.617	32.2566	-
PmNAC023	Pm006470	NAP	100.07	13.5621	1945.75	46.6043	54.1939	437.627	107.243	33.5798	-
PmNAC040	Pm011234	NAC1	39.3336	17.5108	46.4671	4.05532	2.35272	18.1265	3.81831	4.49894	miR164-targeted gene
PmNAC042	Pm011603	ATNAC3	120.372	21.7625	851.523	617.981	289.95	971.034	956.353	92.2749	-
PmNAC048	Pm012630	ATAF1	1072.05	22.0447	191.689	39.4824	30.9595	46.5575	439.066	28.65	-
PmNAC057	Pm016114	ANAC084	311.536	8.41446	105.327	2.08205	3.76641	36.8074	22.1036	42.637	-
PmNAC059	Pm017550	NAC2	87.0367	68.9815	72.9636	127.844	141.369	132.219	210.886	74.4471	Membrane-bound gene
PmNAC060	Pm018292	NST1	6.47953	33.4606	0.234792	0.144985	0.13992	-	-	-	-
PmNAC061	Pm018442	-	57.4479	20.0929	7.55403	25.7852	20.8739	7.92207	10.0024	21.5502	-
PmNAC066	Pm019659	TIP	253.409	51.9551	53.507	93.446	66.975	20.7178	246.944	21.5818	Membrane-bound gene
PmNAC082	Pm024558	VNI2	4.58636	13.082	0.804716	1.27504	1.9007	1.09934	0	0.923467	-
PmNAC085	Pm025184	ANAC058	17.9695	16.3826	14.8305	41.3649	42.2269	14.8534	15.6659	8.34969	-
PmNAC086	Pm025307	ANAC087	74.6109	7.02681	14.2983	15.9717	14.9056	17.6267	33.9747	7.09153	-
PmNAC107	Pm028721	ANAC057	6.19883	4.22535	0.796668	13.4634	6.56431	18.1159	4.07189	4.12217	-
