# Supplementary figures and images for: Genome-Wide Analysis of the NAC Transcription Factor Gene Family Reveals Differential Expression Patterns and Cold-Stress Responses in the Woody Plant Prunus mume
Source: MDPI journal article supplement (doi:10.3390/genes9100494), 2018-10-12

# Schematic diagram of PmNAC protein motif

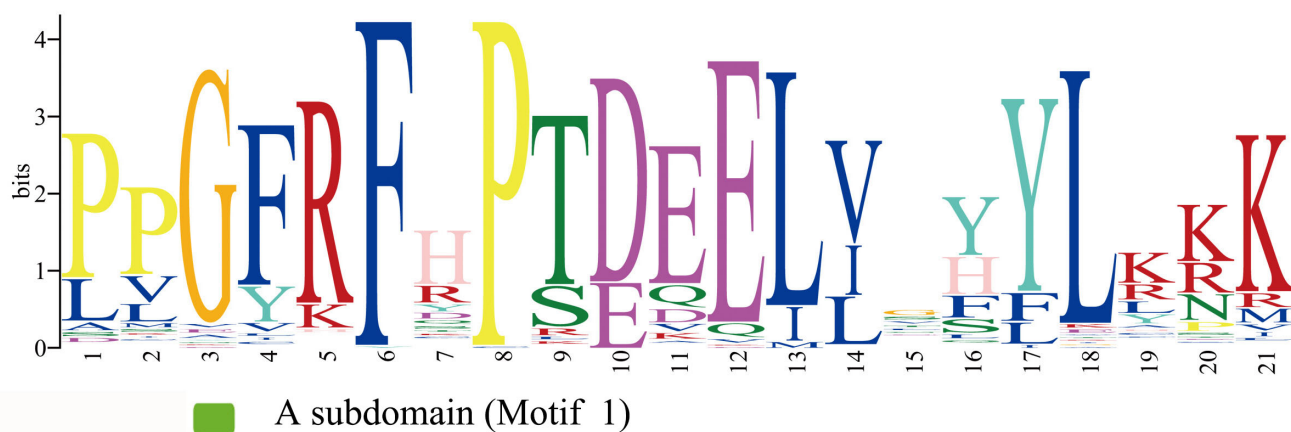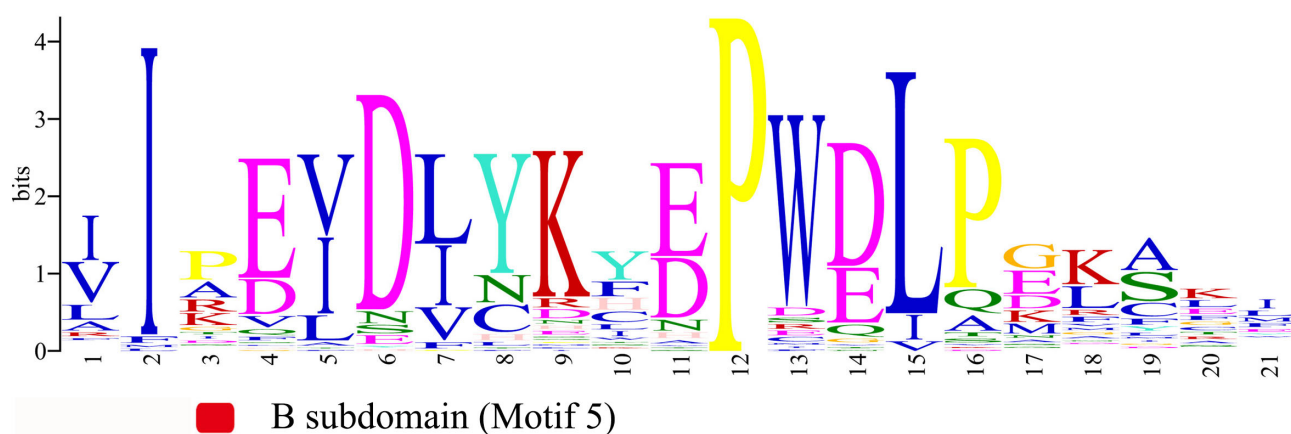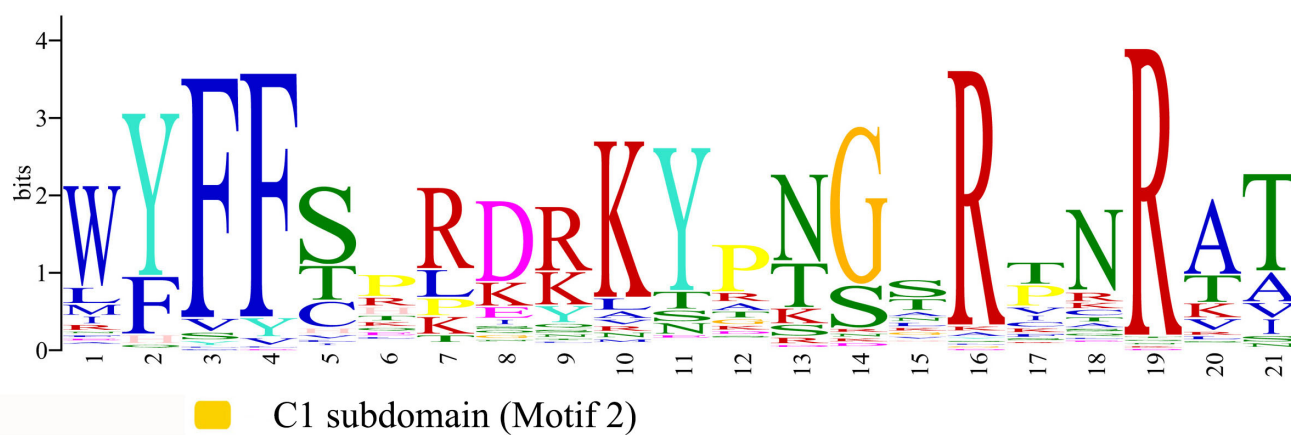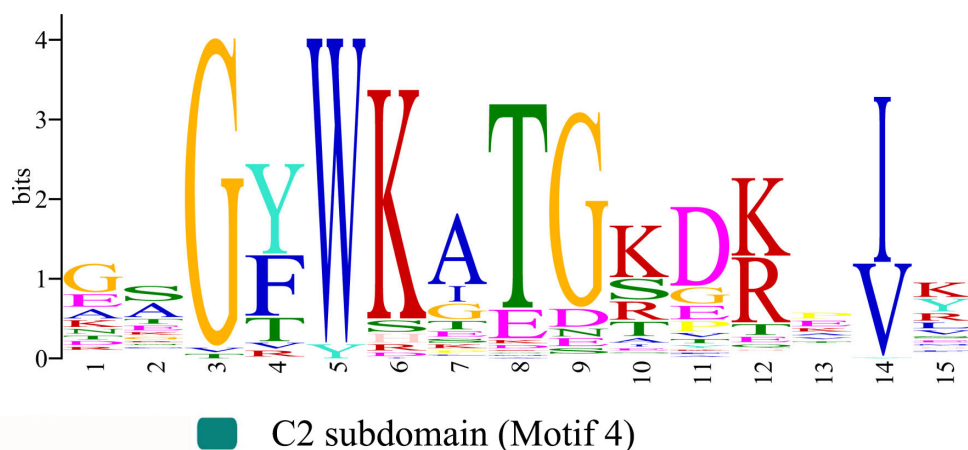

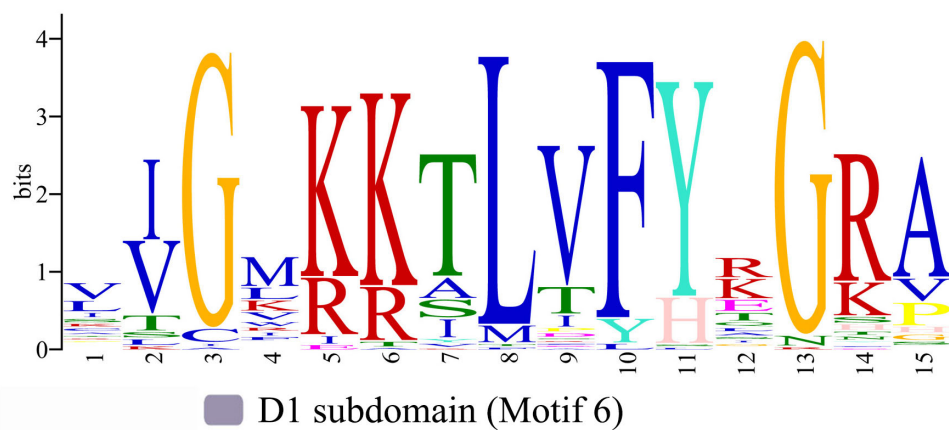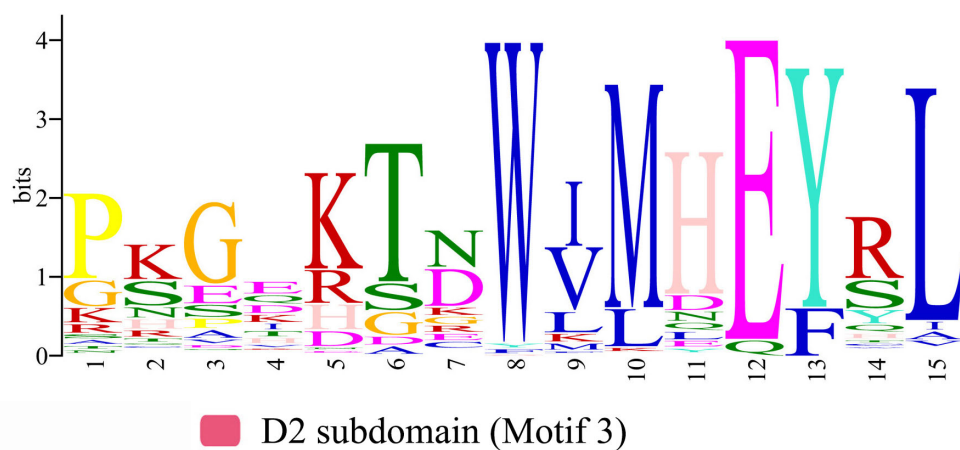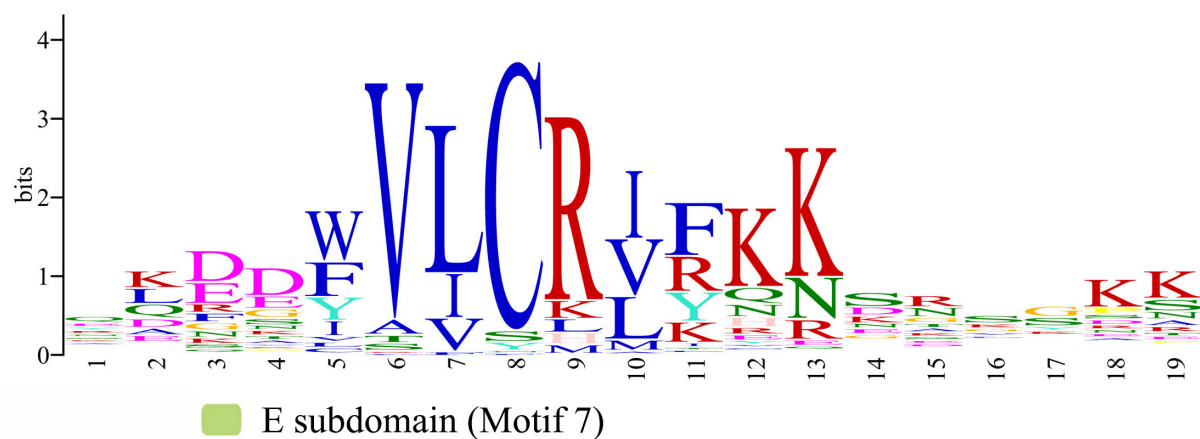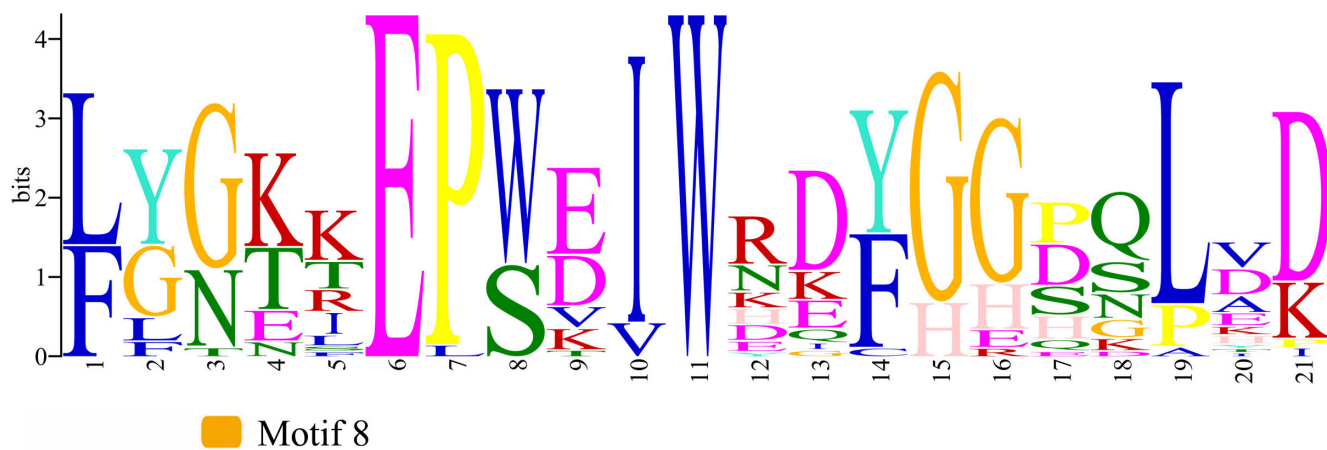

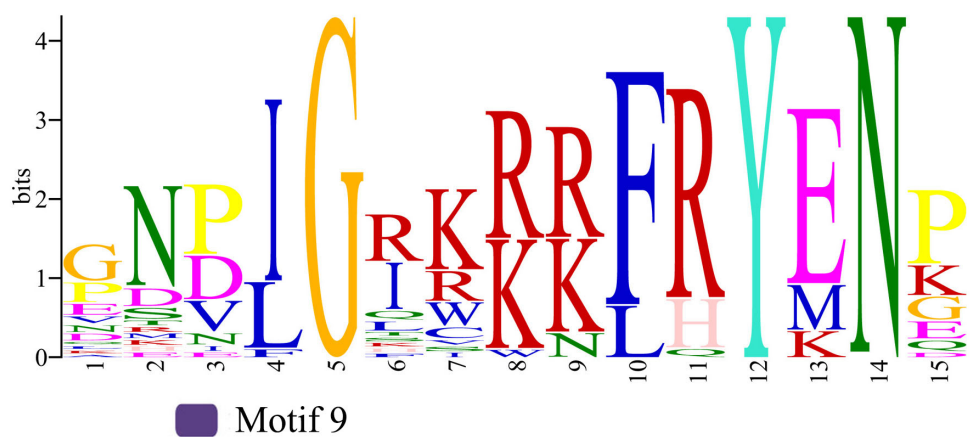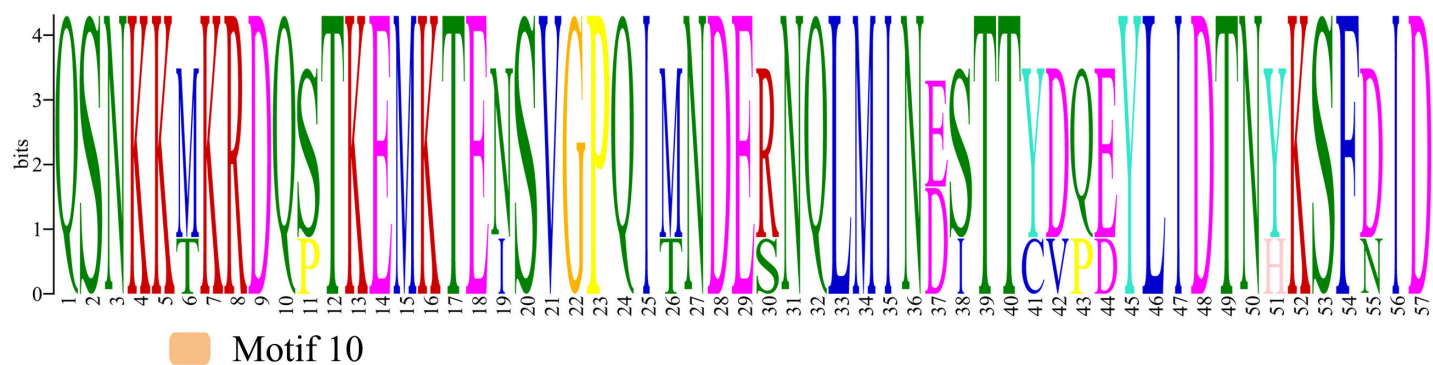

Supplement: s1 [file s1]
